# Supplementary material
Source: PubMed Central journal article supplement (PMC7347706)
Supplement: 10495_2020_1614_MOESM1_ESM.pdf [file 10495_2020_1614_MOESM1_ESM.pdf]

**Supplementary Table S1. Genes involved in DNA sensing and response in different mammalian species\***

| Species (common name) | Species (scientific name) | Gene   | GenBank Gene ID | Integrity of the coding sequence            |
|-----------------------|---------------------------|--------|-----------------|---------------------------------------------|
| Malayan pangolin      | Manis javanica            | CGAS   | n.a.            | pseudogene                                  |
| Malayan pangolin      | Manis javanica            | STING1 | 108405108       | pseudogene                                  |
| Malayan pangolin      | Manis javanica            | IFI16  | n.a.            | absent                                      |
| Malayan pangolin      | Manis javanica            | AIM2   | 108394537       | intact                                      |
| Malayan pangolin      | Manis javanica            | TLR9   | 108404433       | intact                                      |
| Malayan pangolin      | Manis javanica            | CASP1  | 108385984       | intact, protein: XP_017499094.1             |
| Malayan pangolin      | Manis javanica            | DDX43  | 108385904       | intact                                      |
| Malayan pangolin      | Manis javanica            | MT01   | 108385903       | intact                                      |
| Malayan pangolin      | Manis javanica            | MYD88  | 108401029       | intact                                      |
| Malayan pangolin      | Manis javanica            | PYCARD | 108400691       | intact                                      |
| Malayan pangolin      | Manis javanica            | TBK1   | 108399262       | intact                                      |
| Cat                   | Felis catus               | CGAS   | 101098056       | intact                                      |
| Cat                   | Felis catus               | STING1 | 101090737       | intact                                      |
| Cat                   | Felis catus               | IFI16  | 101095311       | intact                                      |
| Cat                   | Felis catus               | AIM2   | n.a.            | absent                                      |
| Cat                   | Felis catus               | TLR9   | 493839          | intact                                      |
| Dog                   | Canis lupus familiaris    | CGAS   | 611033          | intact (alternative name: MB21D1)           |
| Dog                   | Canis lupus familiaris    | STING1 | 606815          | intact                                      |
| Dog                   | Canis lupus familiaris    | AIM2   | n.a.            | absent                                      |
| Dog                   | Canis lupus familiaris    | IFI16  | 488622          | intact (interferon-activatable protein 203) |
| Dog                   | Canis lupus familiaris    | TLR9   | 403502          | intact                                      |
| Bear                  | Ursus arctos horribilis   | CGAS   | 113261117       | intact                                      |
| Bear                  | Ursus arctos horribilis   | STING1 | 113261804       | intact                                      |
| Bear                  | Ursus arctos horribilis   | IFI16  | 113246676       | intact, protein: XP_026343122.1             |
| Bear                  | Ursus arctos horribilis   | AIM2   | n.a.            | absent                                      |
| Bear                  | Ursus arctos horribilis   | TLR9   | 113256623       | intact                                      |
| Cattle                | Bos taurus                | CGAS   | 782472          | intact                                      |
| Cattle                | Bos taurus                | STING1 | 533661          | intact                                      |
| Cattle                | Bos taurus                | IFI16  | 506759          | intact                                      |
| Cattle                | Bos taurus                | AIM2   | 104971426       | pseudogene                                  |
| Cattle                | Bos taurus                | TLR9   | 282602          | intact                                      |
| Mouse                 | Mus musculus              | CGAS   | 214763          | intact                                      |
| Mouse                 | Mus musculus              | STING1 | 72512           | intact                                      |
| Mouse                 | Mus musculus              | IFI16  | 102639543       | intact (ifi206)                             |
| Mouse                 | Mus musculus              | AIM2   | 383619          | intact                                      |
| Mouse                 | Mus musculus              | TLR9   | 81897           | intact                                      |
| Human                 | Homo sapiens              | CGAS   | 115004          | intact                                      |
| Human                 | Homo sapiens              | STING1 | 340061          | intact                                      |
| Human                 | Homo sapiens              | IFI16  | 3428            | intact                                      |
| Human                 | Homo sapiens              | AIM2   | 9447            | intact                                      |
| Human                 | Homo sapiens              | TLR9   | 54106           | intact                                      |

\* Note: Genes mentioned in the text and in figure 3 are included.
